# Supplementary material for: Water stimulus-responsive room temperature afterglow materials with color tunability based on inorganic/organic H–G hybrid systems
Source: Royal Society of Chemistry journal article supplement (doi:10.1039/d3tc03686c), 2023-11-30
Supplement: d3tc03686c2.pdf [file d3tc03686c2.pdf]

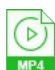

Video S1.mp4

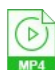

Video S2.mp4



Video S3.mp4

Video S1-S3 IPA@HBA under UV excitation at 254, 302 and 365nm.

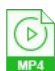

Video S4.mp4

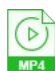

Video S5.mp4



Video S6.mp4

Video S4-S6 IPA@HBA-80 % L under UV excitation at 254, 302 and 365nm.



Video S7.mp4



Video S8.mp4



Video S9.mp4

Video S7-S9 IPA under UV excitation at 254, 302 and 365nm.



Video S10.mp4



Video S11.mp4



Video S12.mp4

Video S10-12 TPA@HBA under UV excitation at 254, 302 and 365nm.



Video S13.mp4



Video S14.mp4



Video S15.mp4

Video S13-15 PA@HBA under UV excitation at 254, 302 and 365nm.



Video S16.mp4



Video S17.mp4



Video S18.mp4

Video S16-18 TPA@HBA-80 % L under UV excitation at 254, 302 and 365nm.

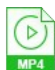

Video S19.mp4

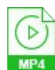

Video S20.mp4



Video S21.mp4

Video S19-20 PA@HBA-80 % L under UV excitation at 254, 302 and 365nm.
